# Supplementary material
Source: PubMed Central journal article supplement (PMC5289739)
Supplement: NIHMS807667-supplement-2.pdf [file NIHMS807667-supplement-2.pdf]

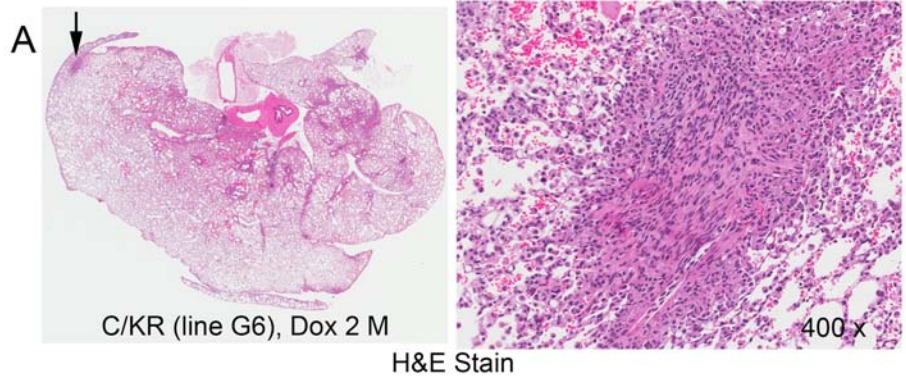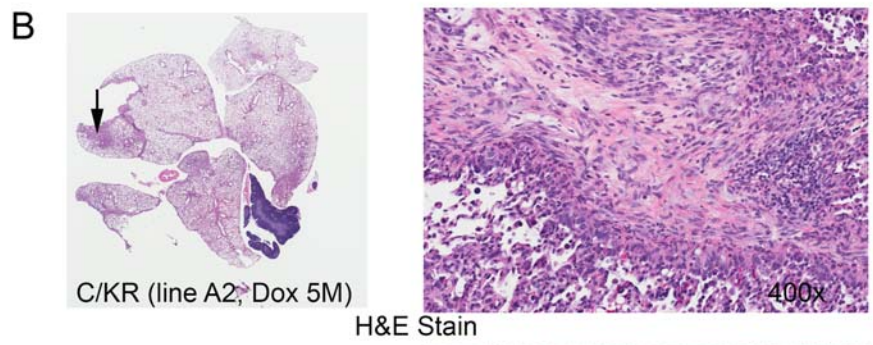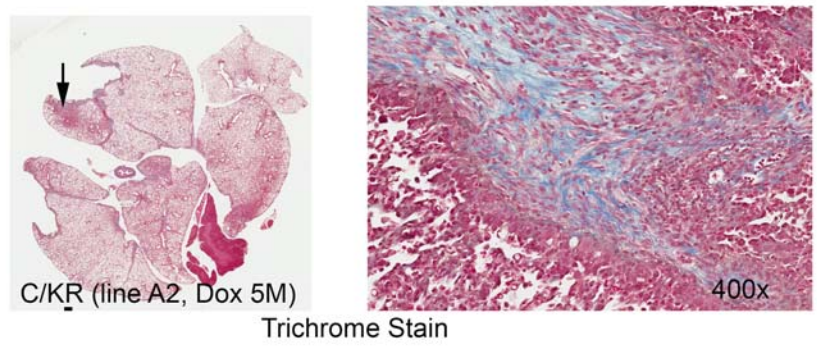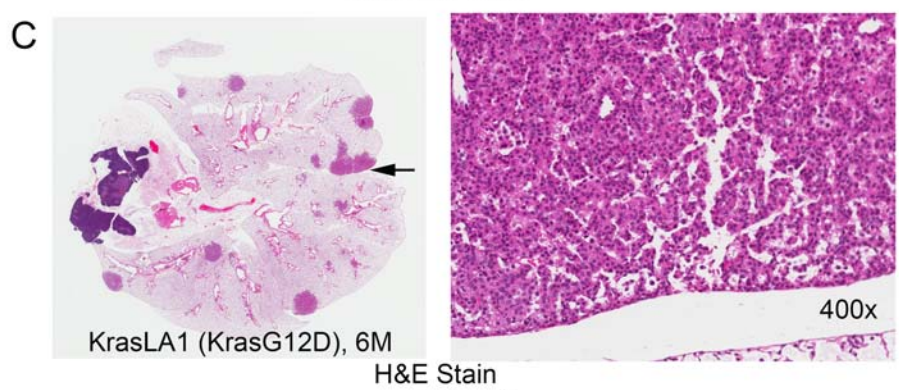

sFig. 1

A

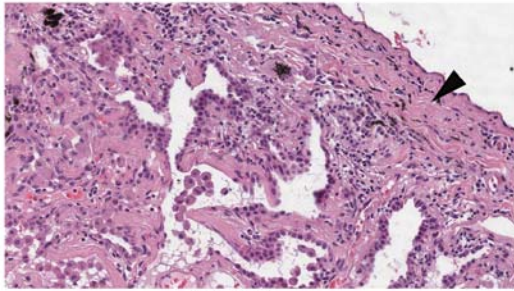

RET fusion  
(TCGA-55-6543-01A-01-DX1)

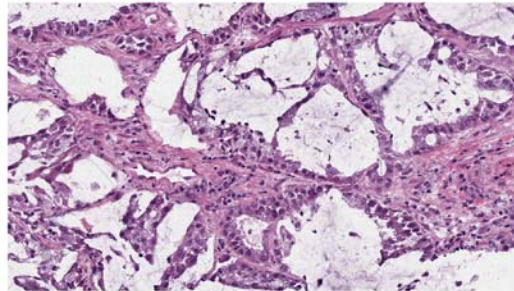

RET fusion  
(TCGA-75-6202-01A-01-BS1)

B

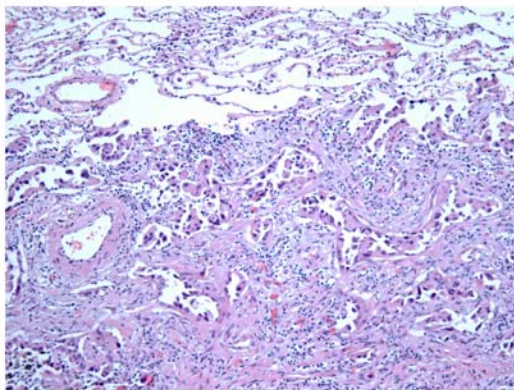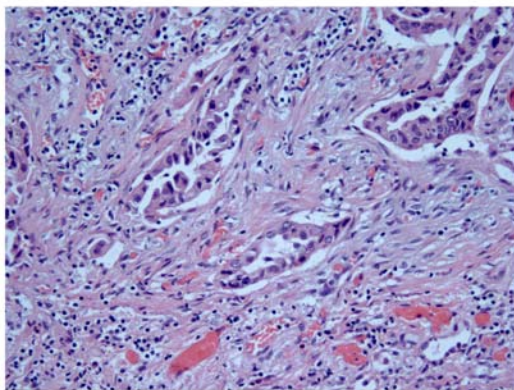

Invasive human lung adenocarcinoma with desmoplasia

sFig. 2

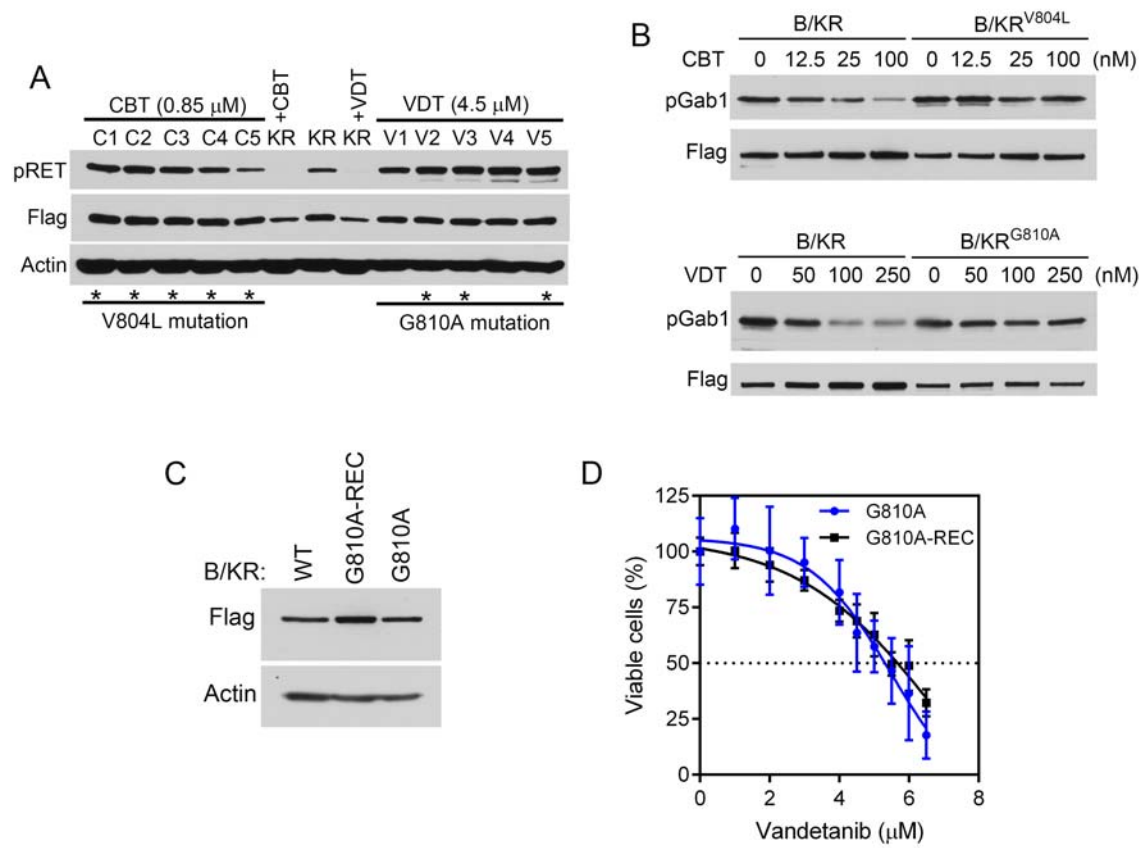

sFig. 3

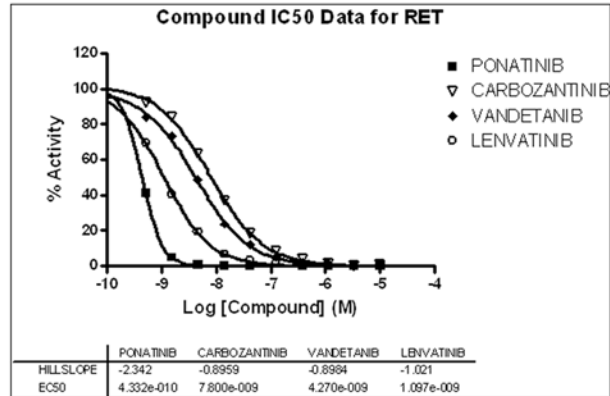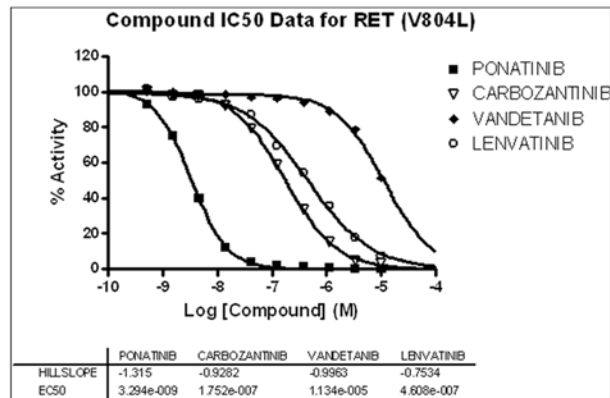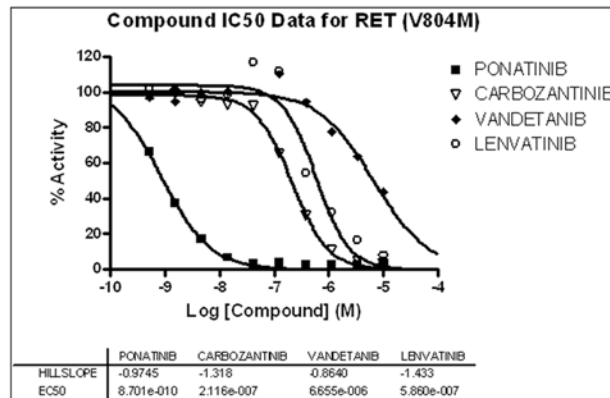

sFig. 4



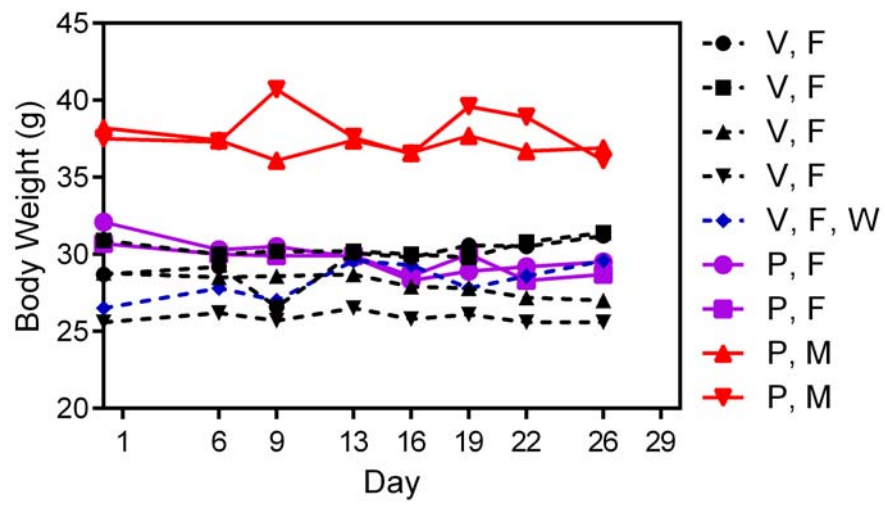

sFig. 5

Treatment

Vehicle

Ponatinib

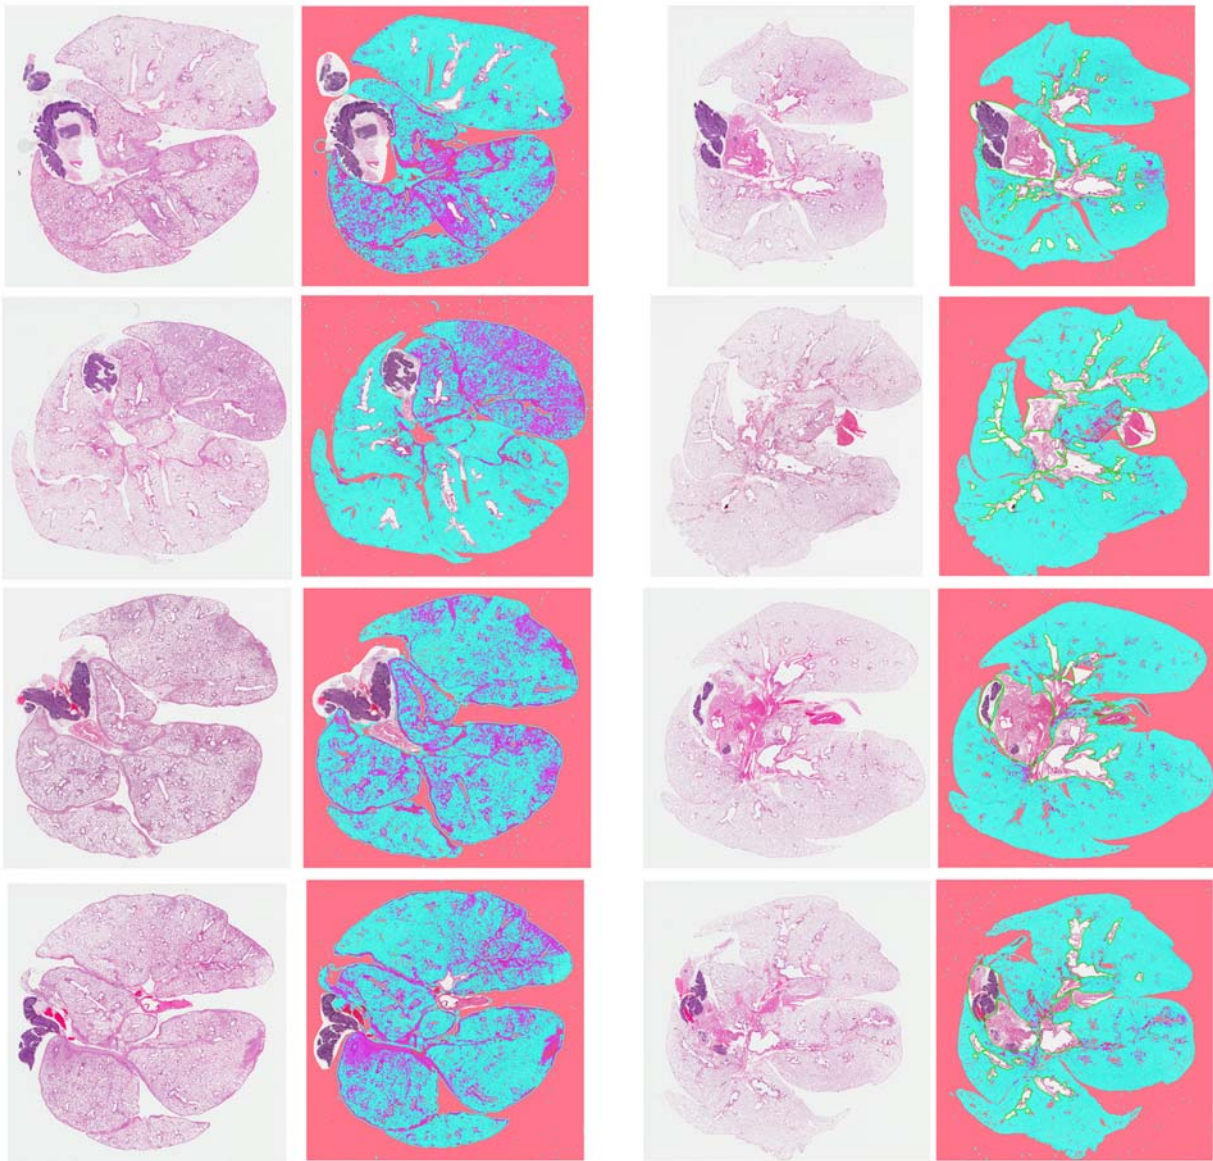

sFig. 6

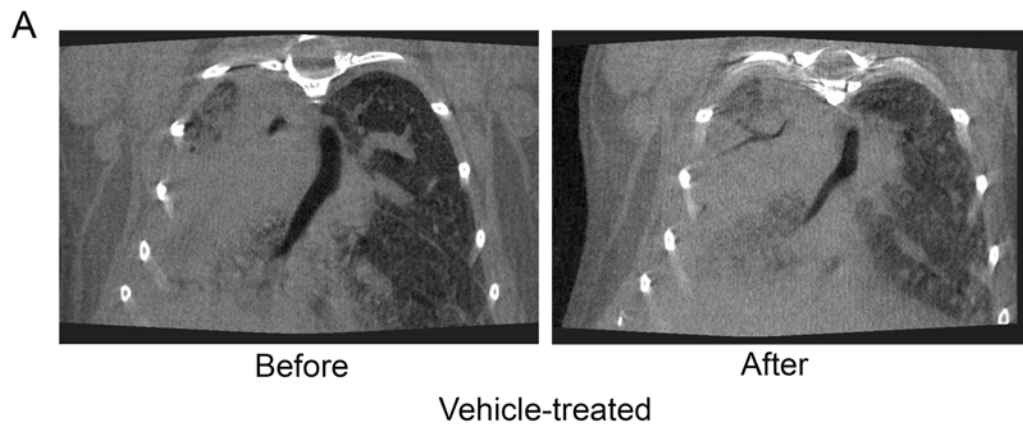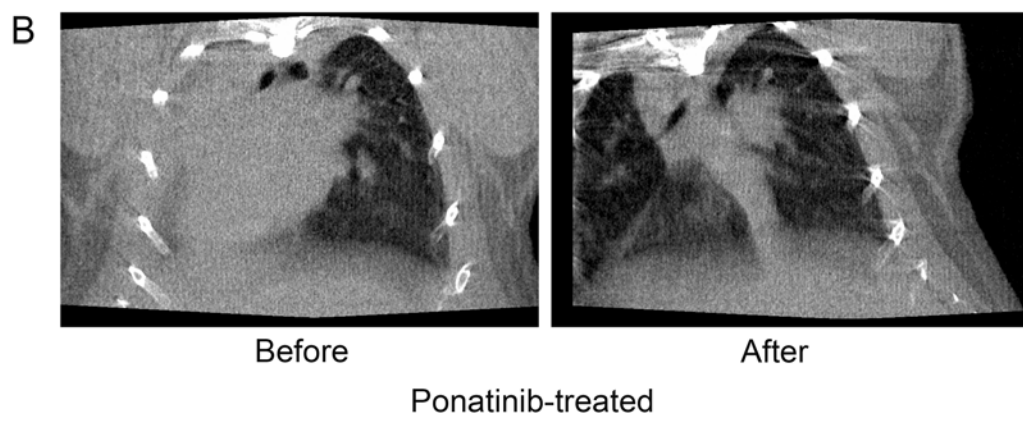

sFig. 7
